# Supplementary material for: A novel ionic liquid-based electrolyte assisting the high performance of low-temperature supercapacitors
Source: Royal Society of Chemistry journal article supplement (doi:10.1039/d2ta04324f), 2022-01-01
Supplement: d2ta04324f1.pdf [file d2ta04324f1.pdf]

## Supporting Information

### Novel Ionic Liquid-based Electrolyte Assisting the High Performance of Low-temperature Supercapacitors

Xueqing Tang<sup>a</sup>, Dewei Xiao<sup>a</sup>, Zhenming Xu<sup>a</sup>, Qingsheng Liu<sup>b</sup>, Bing Ding<sup>a</sup>, Hui Dou<sup>\*a</sup>, and Xiaogang Zhang<sup>a</sup>

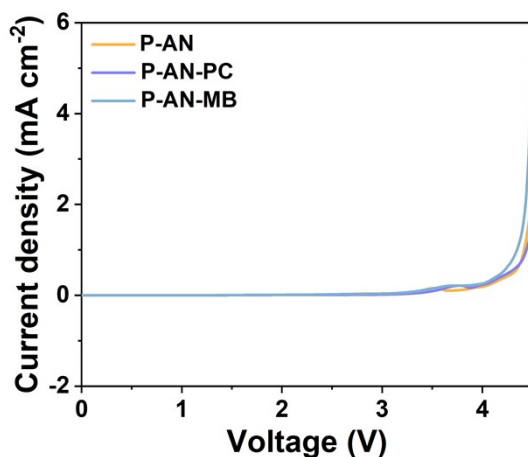

Fig. S1. The LSV curves of the P-AN, P-AN-PC and P-AN-MB at a scan rate of  $2 \text{ mV s}^{-1}$ .

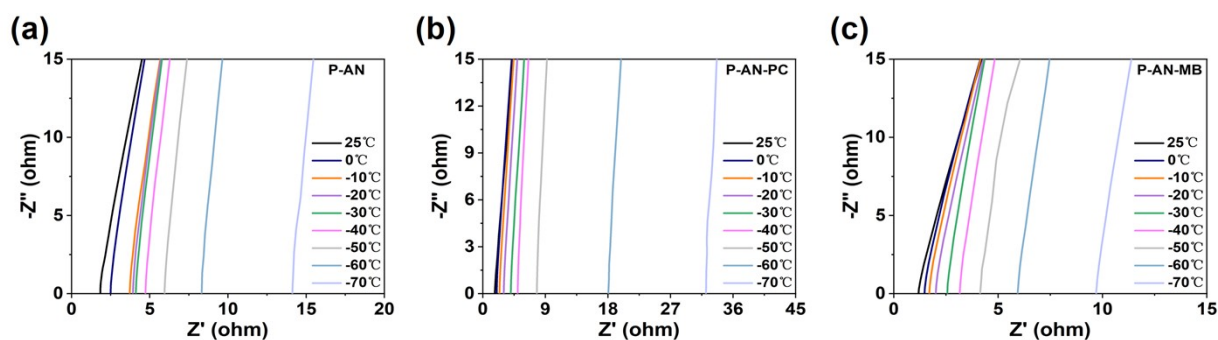

Fig. S2. Nyquist plots of the SCs based on (a) P-AN, (b) P-AN-PC, and (c) P-AN-MB obtained from the EIS at a temperature range from  $25^\circ\text{C}$  to  $-70^\circ\text{C}$ .

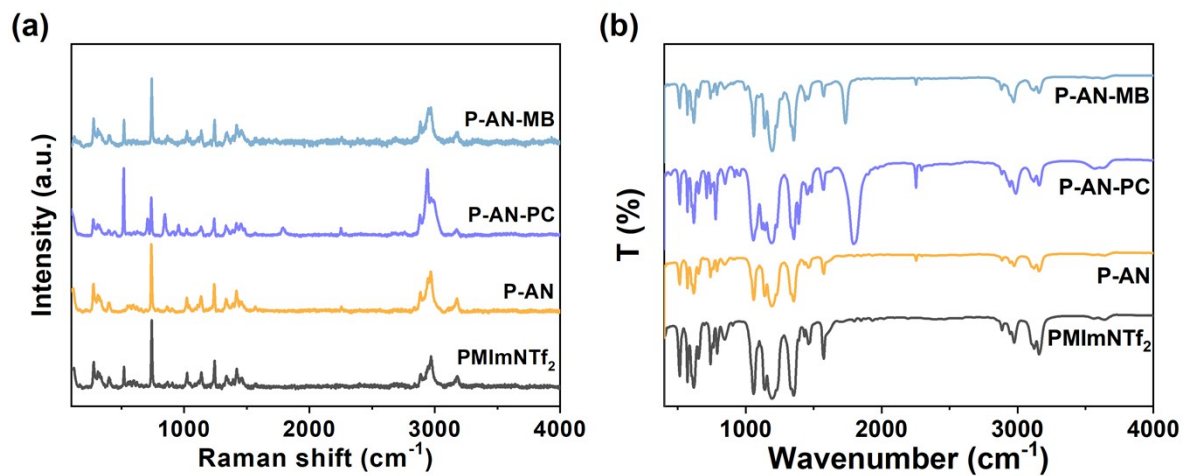

Fig. S3. (a) Raman and (b) FTIR spectra of PMImNTf<sub>2</sub>, P-AN, P-AN-PC, and P-AN-MB.

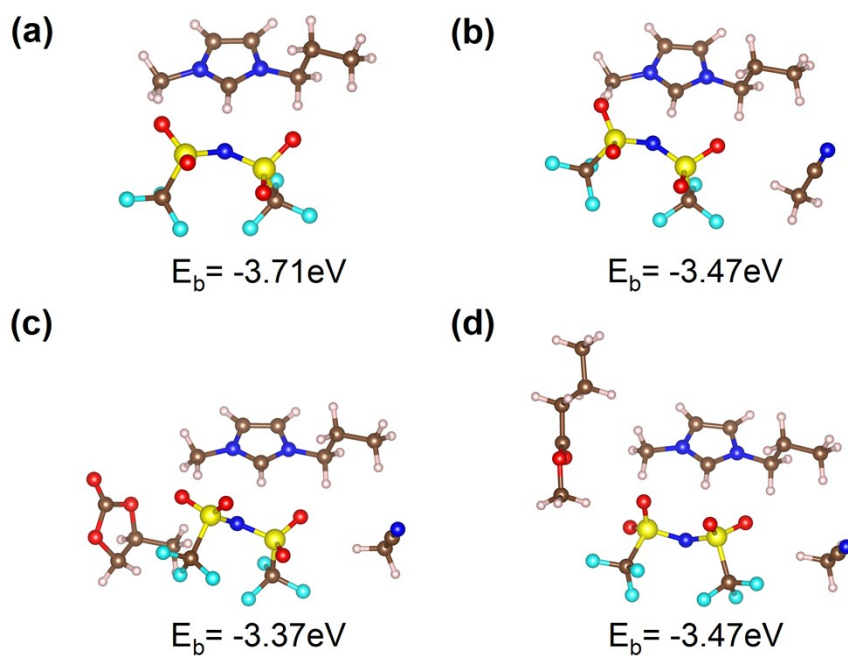

Fig. S4. Binding energies for (a) PMImNTf<sub>2</sub>, (b) P-AN, (c) P-AN-PC, and (d) P-AN-MB systems obtained from DFT calculation. (Atom color: C, brown; N, blue; H, light pink; O, red; S, yellow; and F, aquamarine blue)

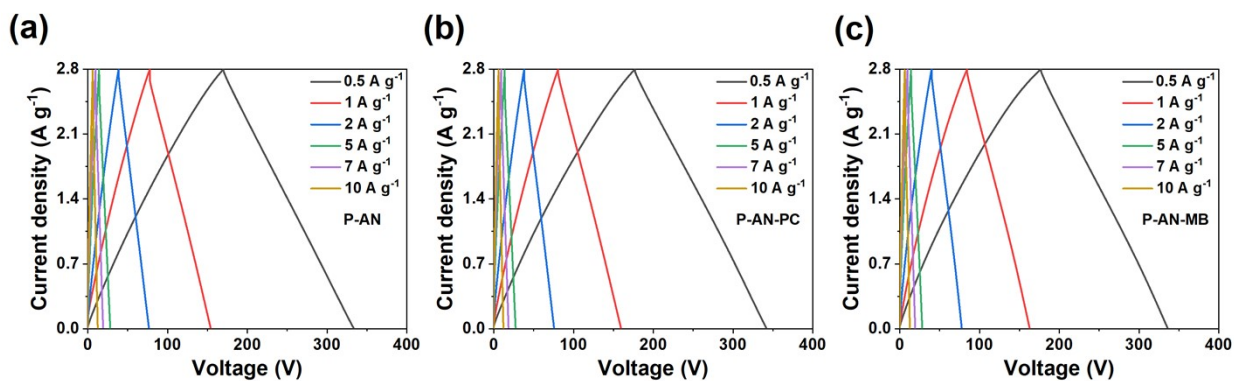

Fig. S5. GCD curves of the SCs at 25 °C based on (a) P-AN, (b) P-AN-PC, and (c) P-AN-MB.

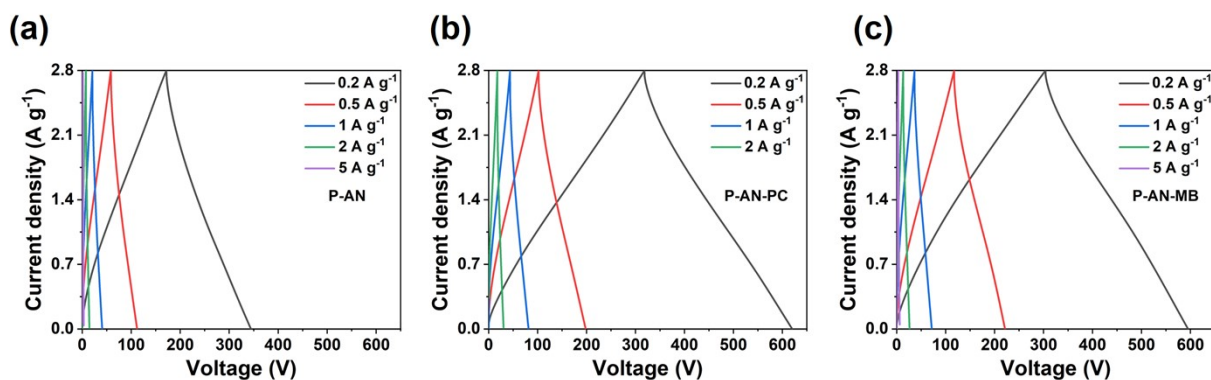

Fig. S6. GCD curves of the SCs at -50 °C based on (a) P-AN, (b) P-AN-PC, and (c) P-AN-MB.

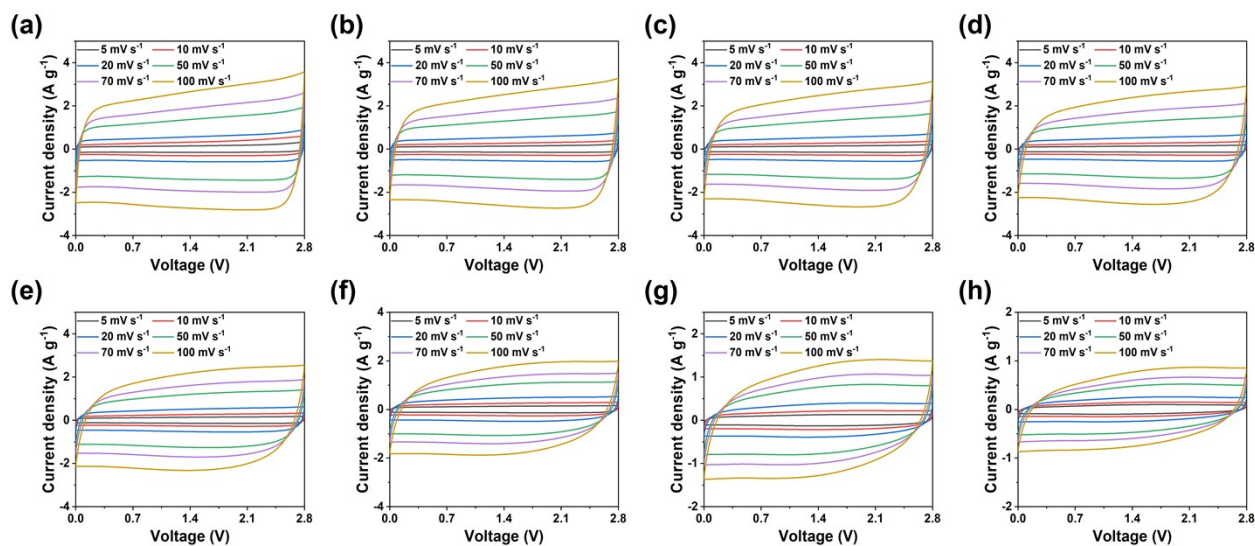

Fig. S7. CV curves of the P-AN-MB-based SCs at (a) 25 °C, (b) 0 °C, (c) -10 °C, (d) -20 °C, (e) -30 °C, (f) -40 °C, (g) -50 °C, (h) -60 °C.

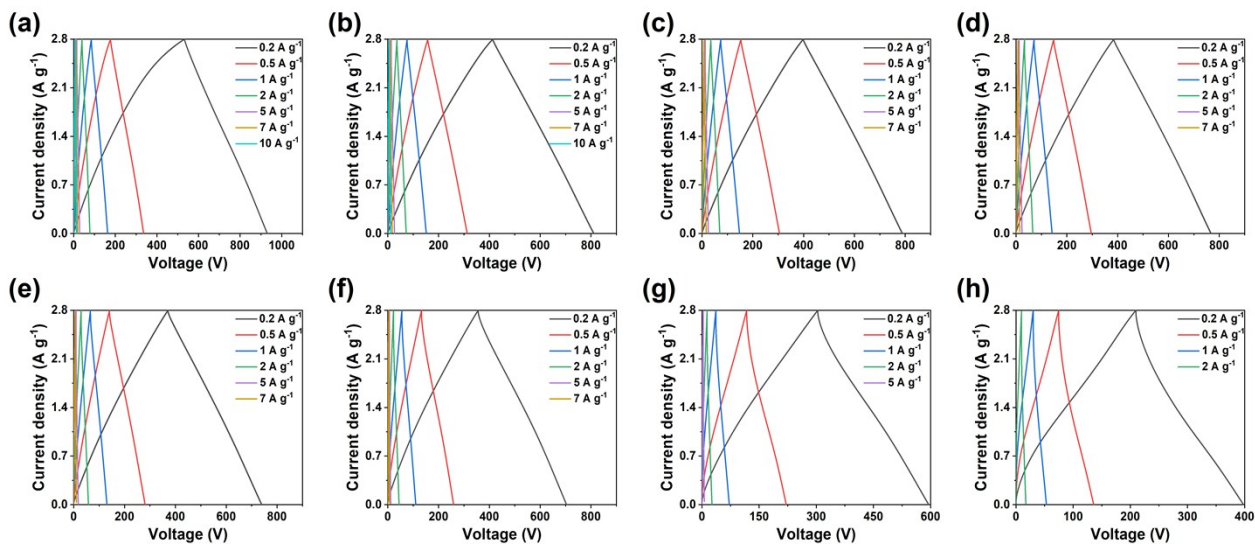

Fig. S8. GCD curves of the P-AN-MB-based SCs at (a) 25 °C, (b) 0 °C, (c) -10 °C, (d) -20 °C, (e) -30 °C, (f) -40 °C, (g) -50 °C, (h) -60 °C.

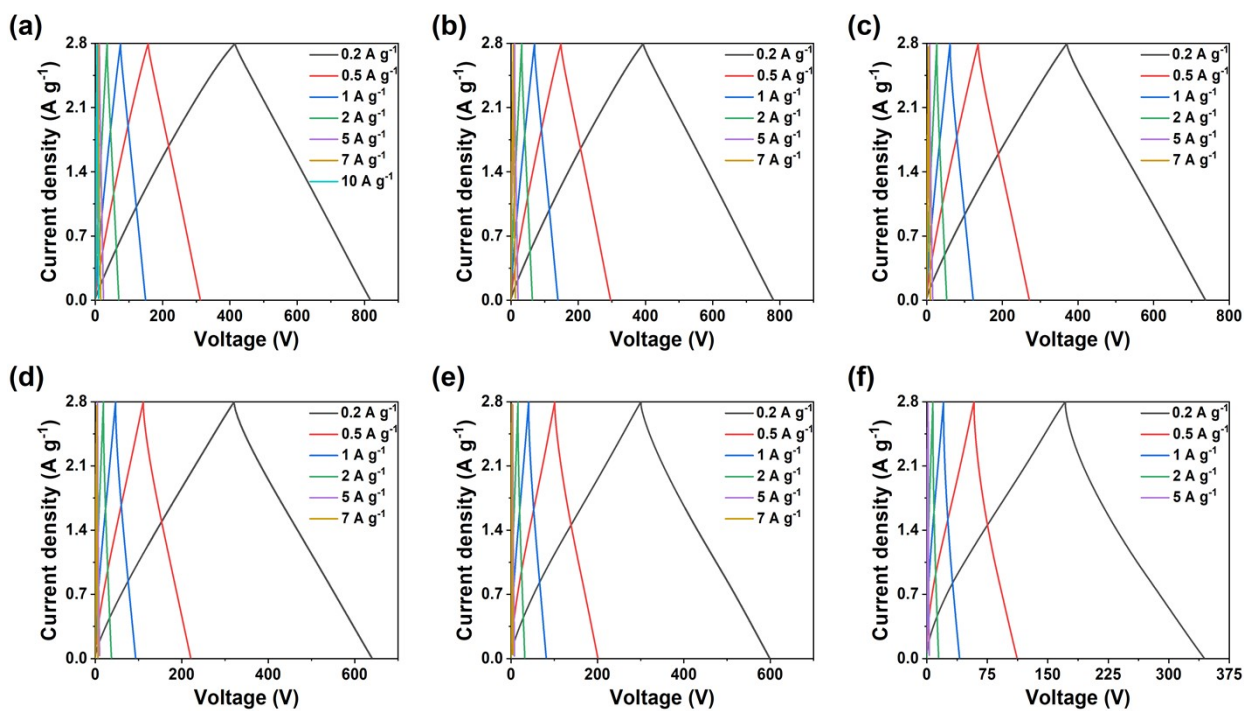

Fig. S9. GCD curves of the P-AN-based SCs at (a) 0 °C, (b) -10 °C, (c) -20 °C, (d) -30 °C, (e) -40 °C, (f) -50 °C.

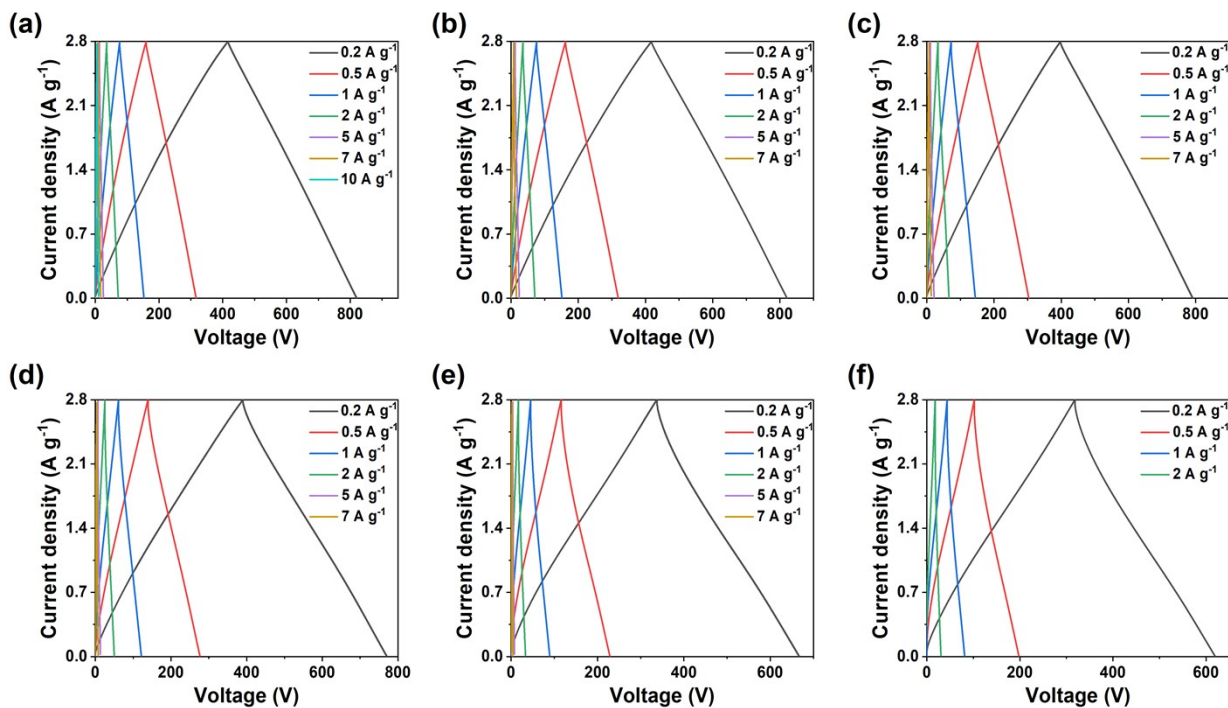

Fig. S10. GCD curves of the P-AN-PC-based SC at (a) 0 °C, (b) -10 °C, (c) -20 °C, (d) -30 °C, (e) -40 °C, (f) -50 °C.

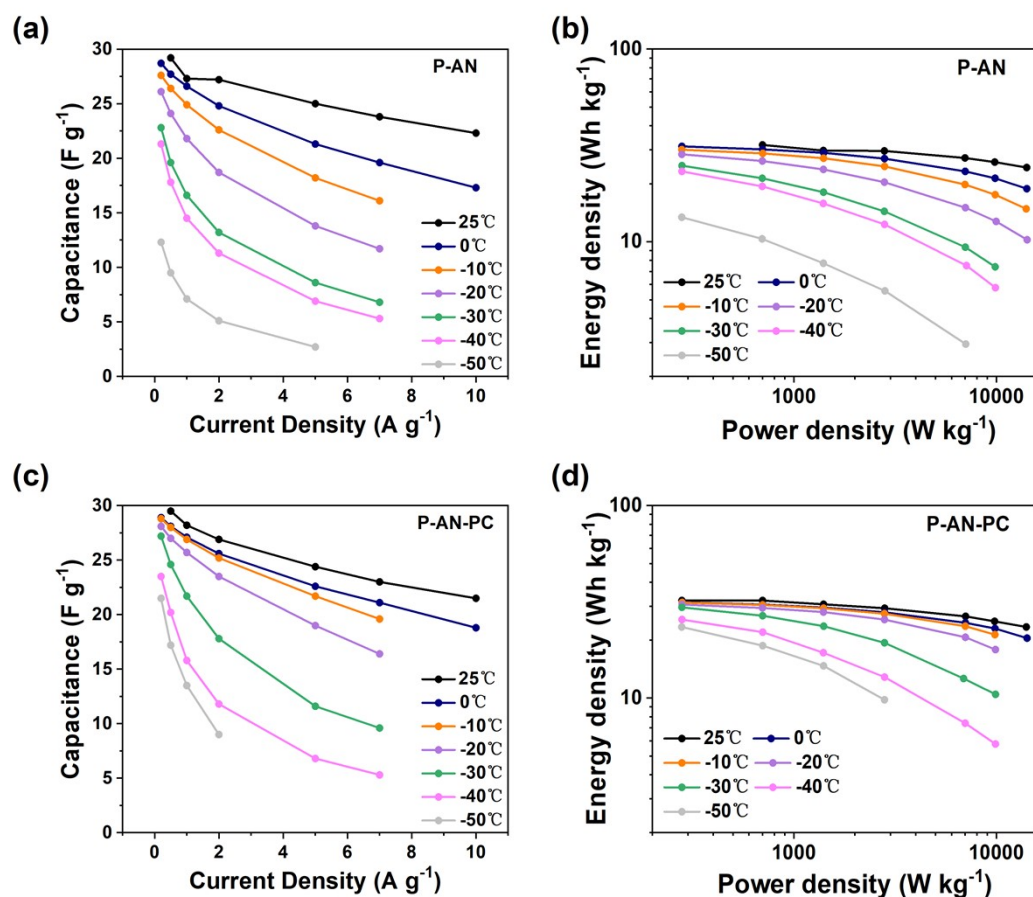

Fig. S11. Specific capacitances as a function of current density of the SCs based on (a) P-AN and (c) P-AN-PC at different temperatures; Ragone plots of the SCs based on (b) P-AN and (d) P-AN-PC at different temperatures.

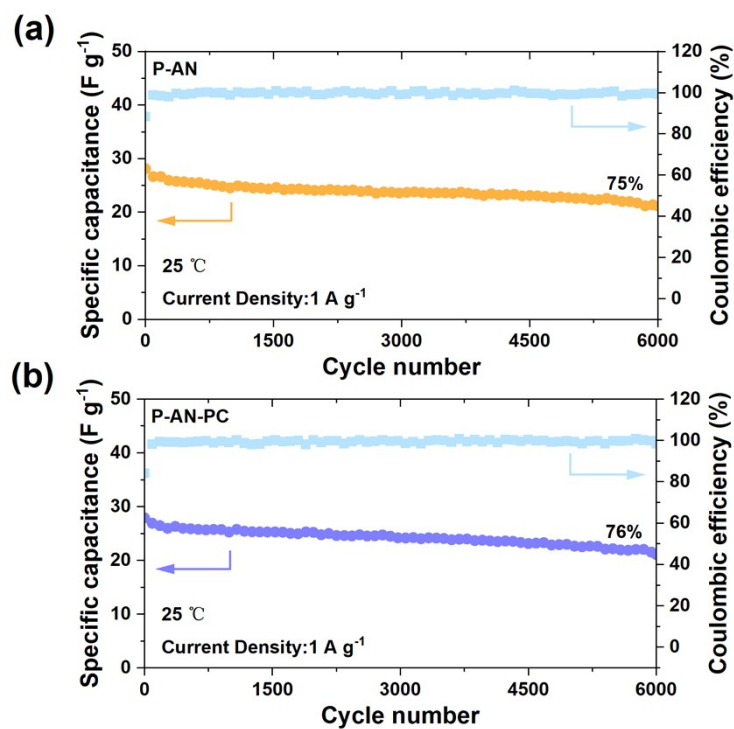

Fig. S12. Cycling performance of the SCs based on (a) P-AN and (b) P-AN-PC at 25 °C and a current density of 1 A g<sup>-1</sup>.

Table S1. Physical properties of ILs

| ILs                                                                                      | Melting points (°C) | Viscosities (cP) |
|------------------------------------------------------------------------------------------|---------------------|------------------|
| 1-ethyl-3-methylimidazolium tetrafluoroborate (EMImBF <sub>4</sub> )                     | 11                  | 45               |
| 1-ethyl-3-methylimidazolium bis((trifluoromethyl)sulfonyl)imide (EMImNTf <sub>2</sub> )  | -15                 | 32               |
| 1-propyl-3-methylimidazolium tetrafluoroborate (PMImBF <sub>4</sub> )                    | -17                 | 103              |
| 1-propyl-3-methylimidazolium bis((trifluoromethyl)sulfonyl)imide (PMImNTf <sub>2</sub> ) | -87                 | 44               |
| 1-butyl-3-methylimidazolium tetrafluoroborate (BMImBF <sub>4</sub> )                     | -81                 | 140              |
| 1-butyl-3-methylimidazolium bis((trifluoromethyl)sulfonyl)imide (BMImNTf <sub>2</sub> )  | -4                  | 69               |

Table S2. Physical characteristics of the solvents involved in this work

| Solvents | Melting points (°C) | Dielectric constants | Viscosities (cP) |
|----------|---------------------|----------------------|------------------|
| AN       | -45.7               | 37.5                 | 0.34             |
| PC       | -47.0               | 64.4                 | 2.53             |
| MB       | -85.8               | 5.48                 | 0.54             |

Table S3. FTIR information of the electrolytes

| Electrolytes         | Wavenumbers of Peak (cm <sup>-1</sup> ) |                    |                      |
|----------------------|-----------------------------------------|--------------------|----------------------|
|                      | $\nu(\text{Alkyl C-H})$                 | $\nu(\text{C2-H})$ | $\nu(\text{C4,5-H})$ |
| PMImNTf <sub>2</sub> | 2885.9, 2944.8, 2975.1                  | 3122.2             | 3158.3               |
| P-AN                 | 2885.5, 2945.2, 2975.1                  | 3121.2             | 3158.3               |
| P-AN-PC              | 2884.0, 2943.3, 2987.2                  | 3119.8             | 3159.8               |
| P-AN-MB              | 2881.6, 2944.3, 2970.8                  | 3120.3             | 3156.9               |

Table S4. The average numbers of hydrogen bonds for PMImNTf<sub>2</sub>, P-AN, P-AN-PC, and P-AN-MB systems

| Systems              | H-O | H-N | H-F | Sum |
|----------------------|-----|-----|-----|-----|
| PMImNTf <sub>2</sub> | 31  | 99  | 22  | 152 |
| P-AN                 | 28  | 99  | 14  | 141 |
| P-AN-PC              | 53  | 80  | 14  | 147 |
| P-AN-MB              | 46  | 83  | 12  | 141 |

Table S5. Comparison of binding energy obtained from DFT calculation

| Systems              | Total    | Cation  | Anion    | E <sub>b</sub> (Ha) | E <sub>b</sub> (eV) |
|----------------------|----------|---------|----------|---------------------|---------------------|
| PMImNTf <sub>2</sub> | -2210.12 | -383.45 | -1826.53 | -0.14               | -3.71               |
| P-AN                 | -2342.75 | -383.45 | -1959.17 | -0.13               | -3.47               |
| P-AN-PC              | -2724.18 | -383.45 | -2340.60 | -0.12               | -3.37               |
| P-AN-MB              | -2689.45 | -383.45 | -2305.87 | -0.13               | -3.47               |

Table S6. Voltage drops of the SCs based on P-AN, P-AN-PC, and P-AN-MB at -50 °C

| SCs     | 0.2 A g <sup>-1</sup> | 0.5 A g <sup>-1</sup> | 1 A g <sup>-1</sup> | 2 A g <sup>-1</sup> | 5 A g <sup>-1</sup> |
|---------|-----------------------|-----------------------|---------------------|---------------------|---------------------|
| P-AN    | 0.042 V               | 0.100 V               | 0.199 V             | 0.389 V             | 0.943 V             |
| P-AN-PC | 0.045 V               | 0.111 V               | 0.222 V             | 0.439 V             | -                   |
| P-AN-MB | 0.036 V               | 0.085 V               | 0.171 V             | 0.338 V             | 0.827 V             |

Table S7. The R<sub>i</sub> of the SCs based on P-AN, P-AN-PC, and P-AN-MB at different temperatures

| SCs     | 25 °C | 0 °C  | -10 °C | -20 °C | -30 °C | -40 °C | -50 °C | -70 °C |
|---------|-------|-------|--------|--------|--------|--------|--------|--------|
| P-AN    | 1.8 Ω | 3.9 Ω | 4.5 Ω  | 5.6 Ω  | 7.0 Ω  | 9.6 Ω  | 14.1 Ω | 70.2 Ω |
| P-AN-PC | 2.7 Ω | 3.8 Ω | 4.6 Ω  | 5.7 Ω  | 7.4 Ω  | 15.5 Ω | 16.6 Ω | 71.3 Ω |
| P-AN-MB | 3.3 Ω | 5.2 Ω | 5.8 Ω  | 7.1 Ω  | 8.4 Ω  | 11.1 Ω | 15.4 Ω | 41.6 Ω |
